# Supplementary material for: ITGA2 promotes expression of ACLY and CCND1 in enhancing breast cancer stemness and metastasis
Source: PubMed Central journal article supplement — Genes Dis. 2020 Feb 1;8(4):493–508. doi: 10.1016/j.gendis.2020.01.015 (PMC8209312; doi:10.1016/j.gendis.2020.01.015), 2020-02-01
Supplement: mmc2.pdf [file mmc2.pdf]

**Figure S1. KM plots of RFS with integrin expression in basal breast cancer**

|                                    |                                                                                                                          |
|------------------------------------|--------------------------------------------------------------------------------------------------------------------------|
| <i>Unfavorable</i> RFS probability | <b>ITGA2, ITGA5, ITGA6, ITGA7, ITGAV, ITGB1, ITGB3, ITGB6</b>                                                            |
| <i>Favorable</i> RFS probability   | ITGA3, ITGA4, ITGA8, ITGA9, ITGA10, ITGA11, ITGA2B, ITGAM, ITGAX, ITGAL, ITGAE, ITGAD, ITGB2, ITGB4, ITGB5, ITGB7, ITGB8 |

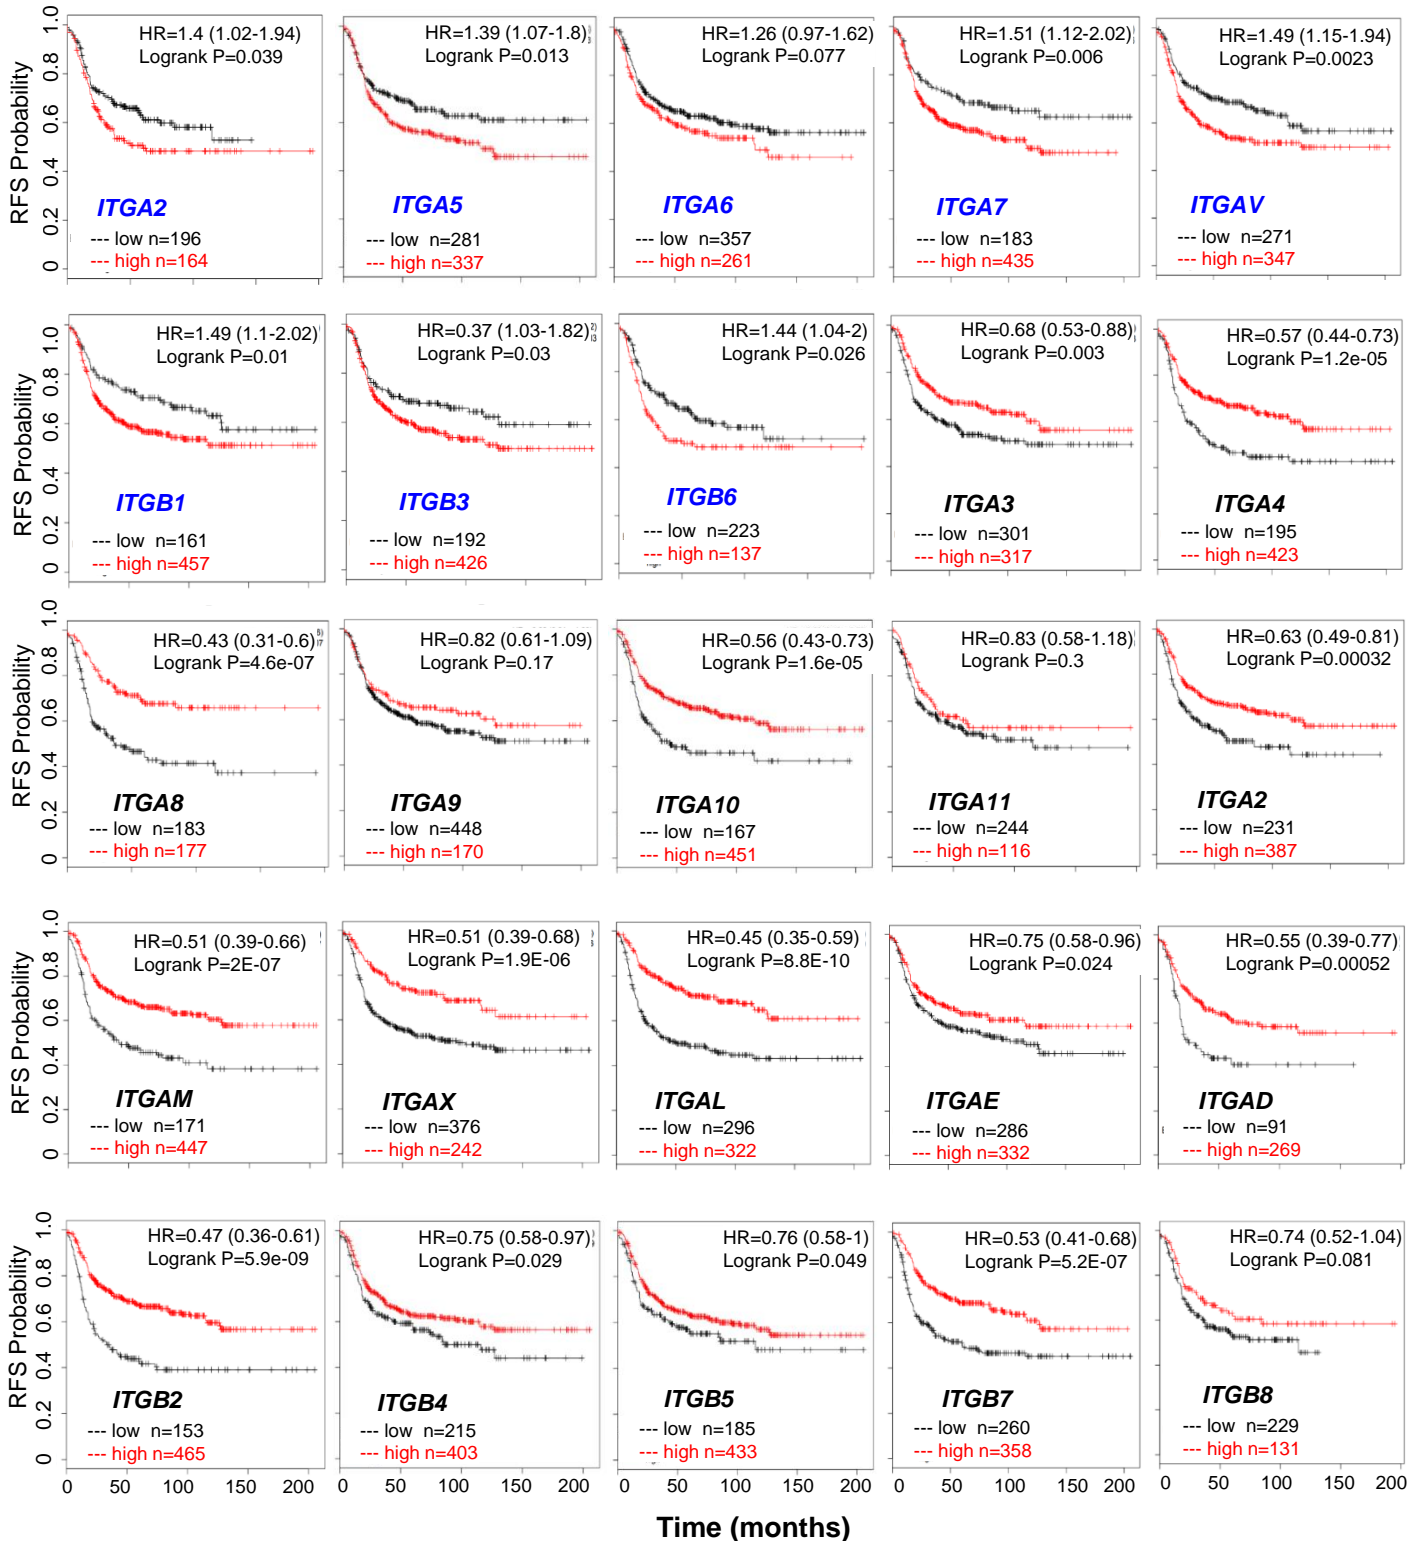

**Figure S1. KM plots of RFS with integrin expression in the basal subtype of breast cancers, analyzed using Breast Cancer Kaplan-Meier Plotter. Individual KM plots with each subunit gene are based on best cut off and Logrank P<=0.05.**

**Figure S2. Expression of *ITGA2* in various breast cancer cell lines.**

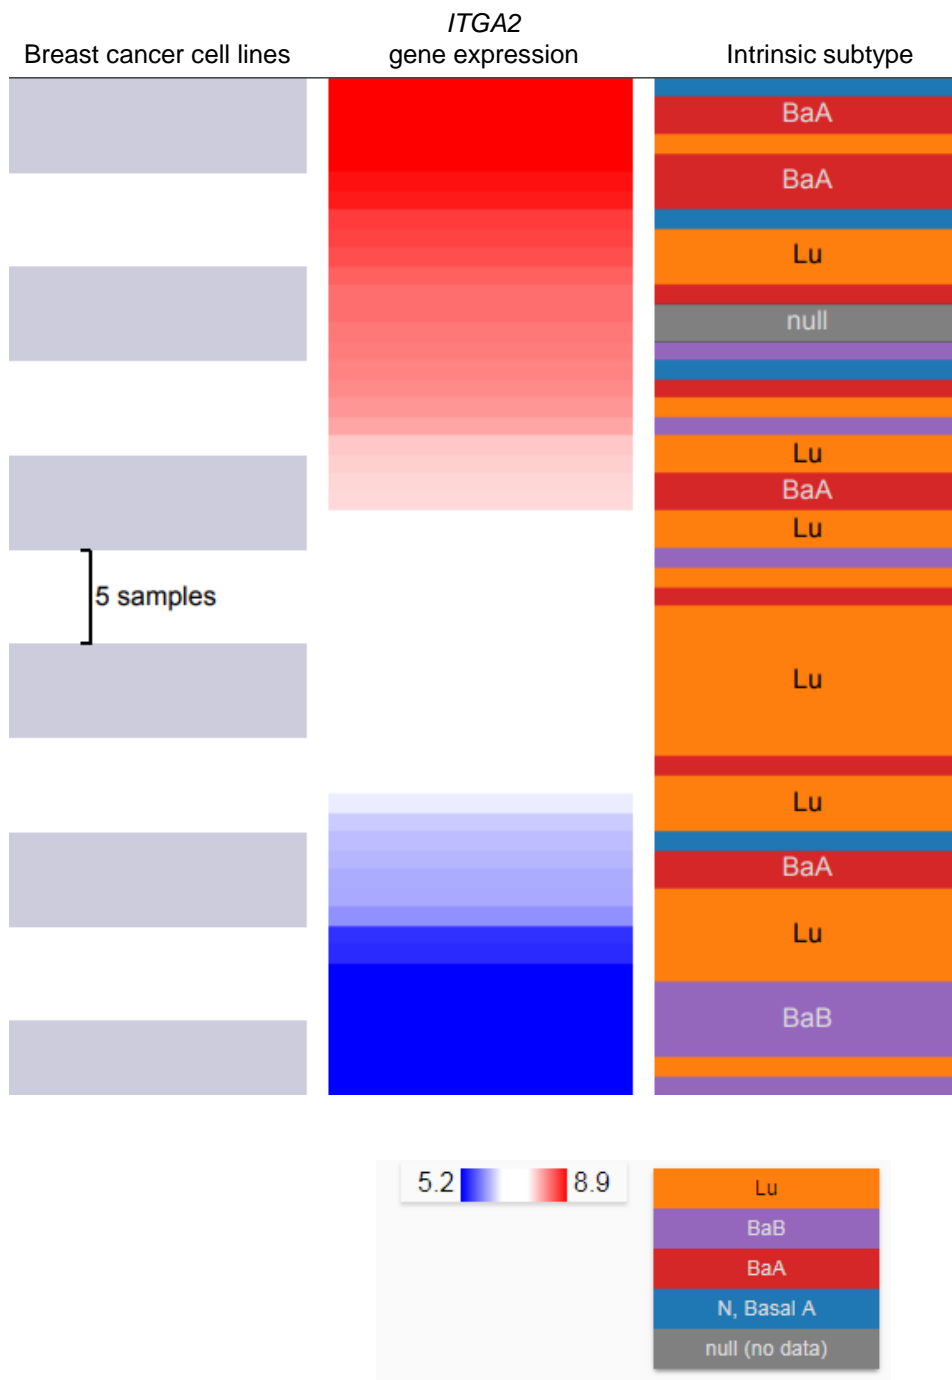

**Figure S2. Expression of *ITGA2* in various breast cancer cell lines (related to Fig 1).**

UCSF Xena browser-based heatmap of *ITGA2* expression across more than 50 cell lines and their corresponding origin of intrinsic subtype of breast cancer.

## Figure S3. miR-206 inhibits *ITGA2* expression

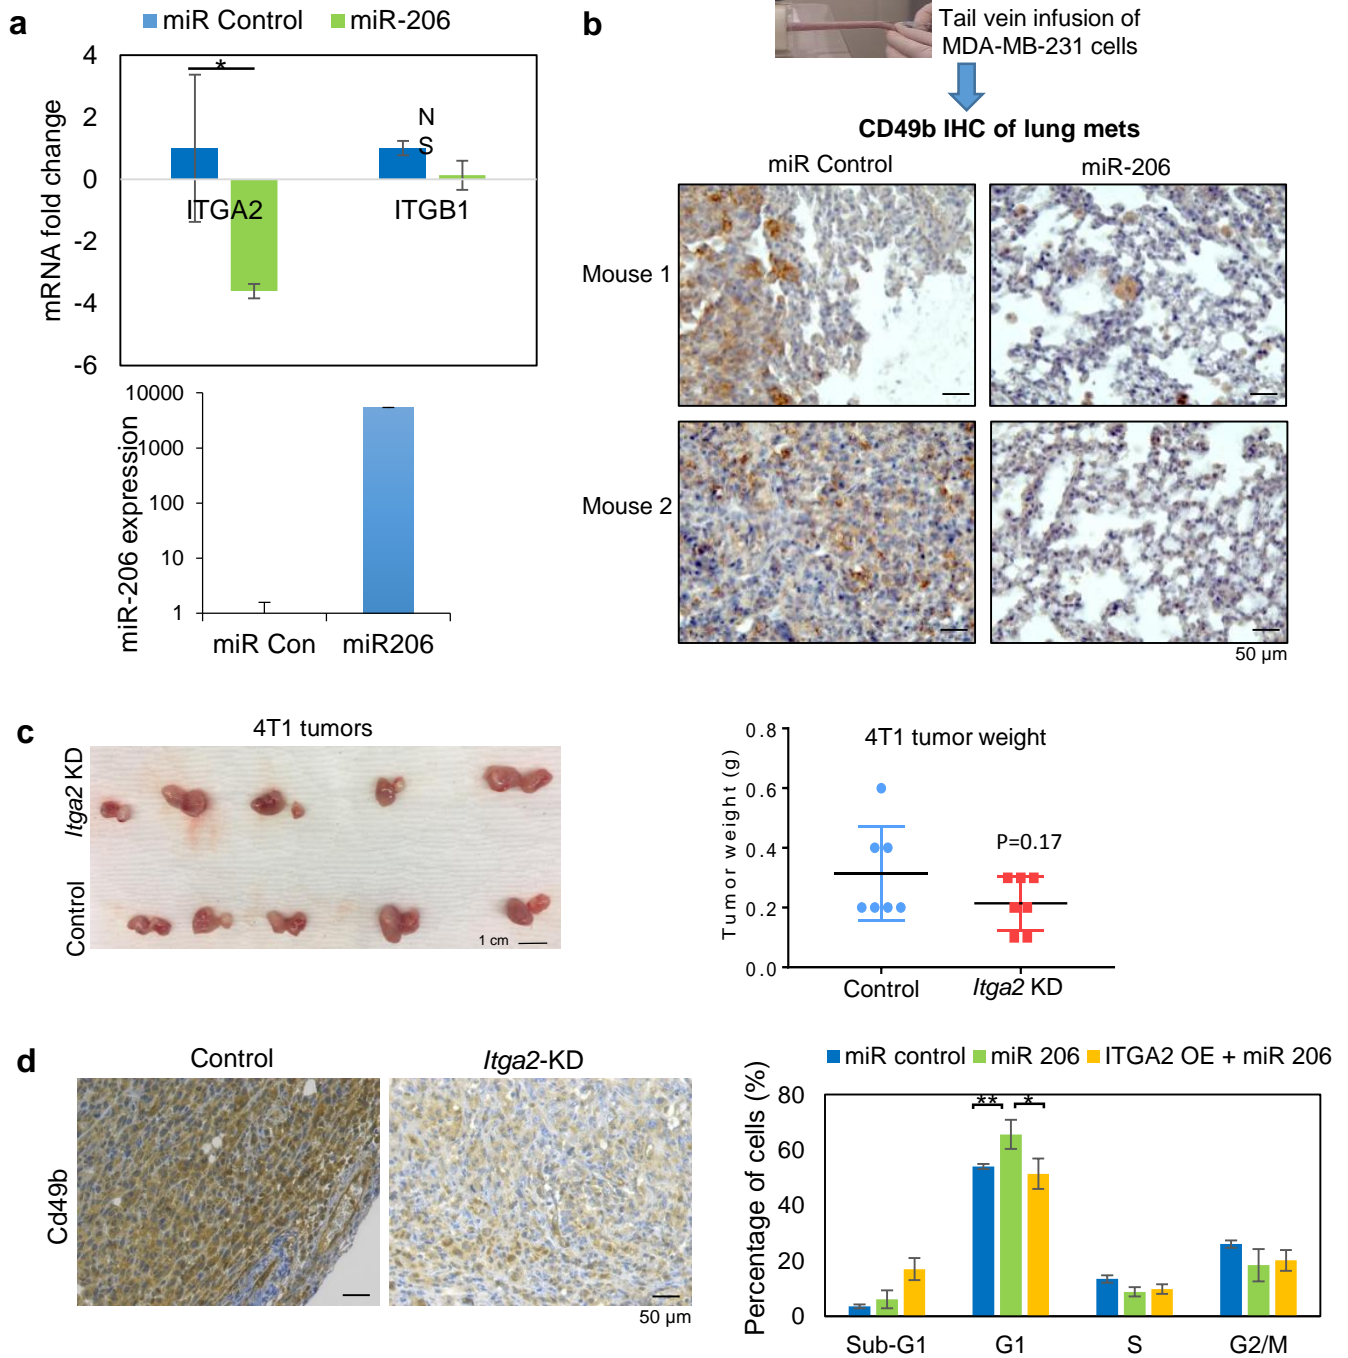

### Figure S3. miR-206 inhibits *ITGA2* expression (related to Figs 1-2)

- Normalized microarray data showing reduced gene expression of *ITGA2* (not *ITGB1*) by transient miR-206 overexpression.
- Human CD49b IHC staining of lung sections of mice 72 days post tail vein injection of TNBC MDA-MB-231 cells transfected with miR-206 and the miR control, respectively. Scale bars=50  $\mu$ m.
- The images (left panel) and weight (right panel) of 4T1 breast tumors mediated by the cells transfected with siRNA control and *siltga2* and orthotopically transplanted into the mammary fat pads of balb/c mice. Scale bar=1 cm. Right panel: *t*-test P=0.17 (n=7, error bars=S.D.)
- Mouse Cd49b IHC staining of engraft tumors in c at Day 9 post orthotopic implantation of 4T1 cells transfected with KD control and *Itga2* siRNAs, respectively. Scale bars=50  $\mu$ m.

**Figure S4. *ITGA2* is associated with *CD44* and *ITGA2* KD inhibits *SOX2* levels and cell confluence.**

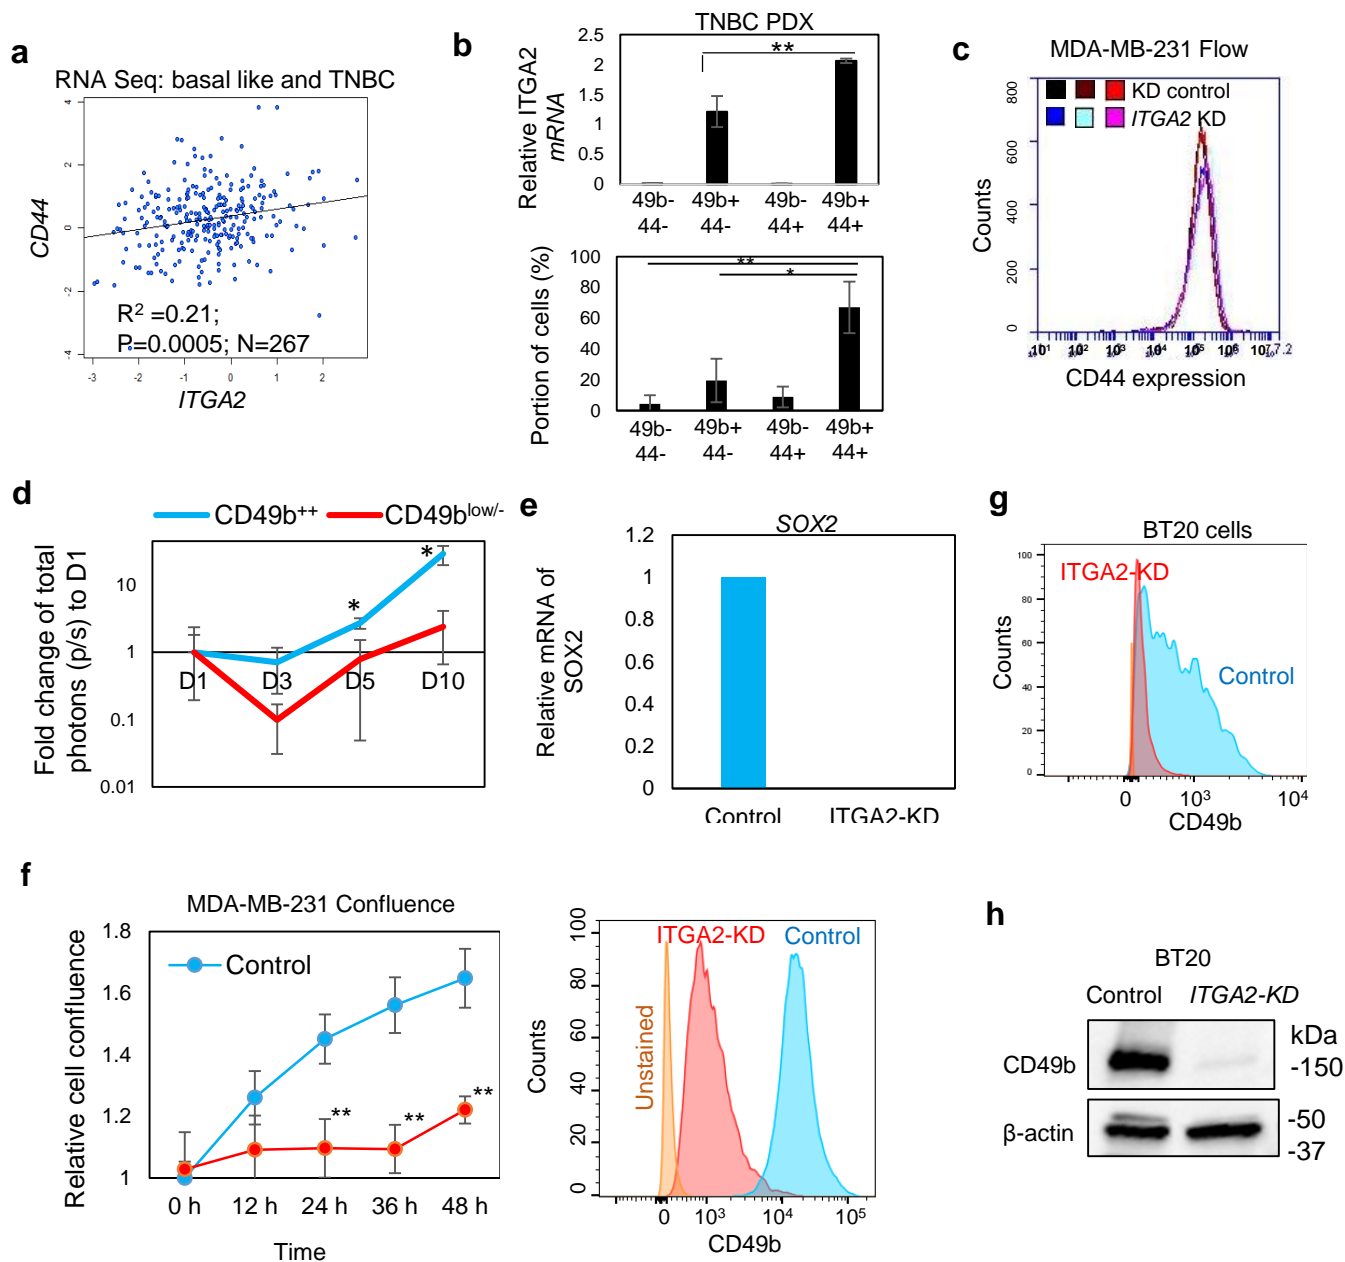

**Figure S4. *ITGA2* KD reduces *SOX2* expression and cell confluence (related to Fig 3)**

- Gene correlation analyses between *CD44* and *ITGA2* in basal-like and TNBC (n=267) using online Breast Cancer Gene Expression Miner v4.0. Pearson's pairwise correlation coefficient R and P values are shown.
- Relative *ITGA2* mRNA expression in sorted populations (top panel) and CD49b protein levels (% of populations, bottom panel) in PDX tumor cells, including CD44/CD49b double negative, single positive and double positive cells, measured by RT-PCR (top panel) and flow cytometry (bottom panel), respectively. \*\*P<0.01, \*P<0.05 (*t*-test). Error bars=S.D.
- Flow profiles of CD44 protein expression in MDA-MB-231 cells which were not modulated by *ITGA2* KD.
- Fold change (Log 10) of CD49b<sup>++</sup> and CD49b<sup>low/-</sup> cell-derived tumor burden (total photons, p/s) to Day 1 (D1). \*P=0.04 (D5) and 0.02 (D10) (*t*-test). Error bars=S.D.
- ITGA2* KD decreased *SOX2* mRNA levels in MDA-MB-231 cells, which became undetectable by RT-PCR.
- Confluence and CD49b expression of MDA-MB-231 cells upon *ITGA2* KD. \*\**t*-test P<0.01 (error bars=S.D.).
- Flow analyses of reduced CD49b levels in BT20 cells upon *ITGA2* KD.
- Immunoblot validation for decreased CD49b expression of BT20 cells upon *ITGA2* KD.

**Figure S5. Pooled and single siTGA2s caused minimal cell death**

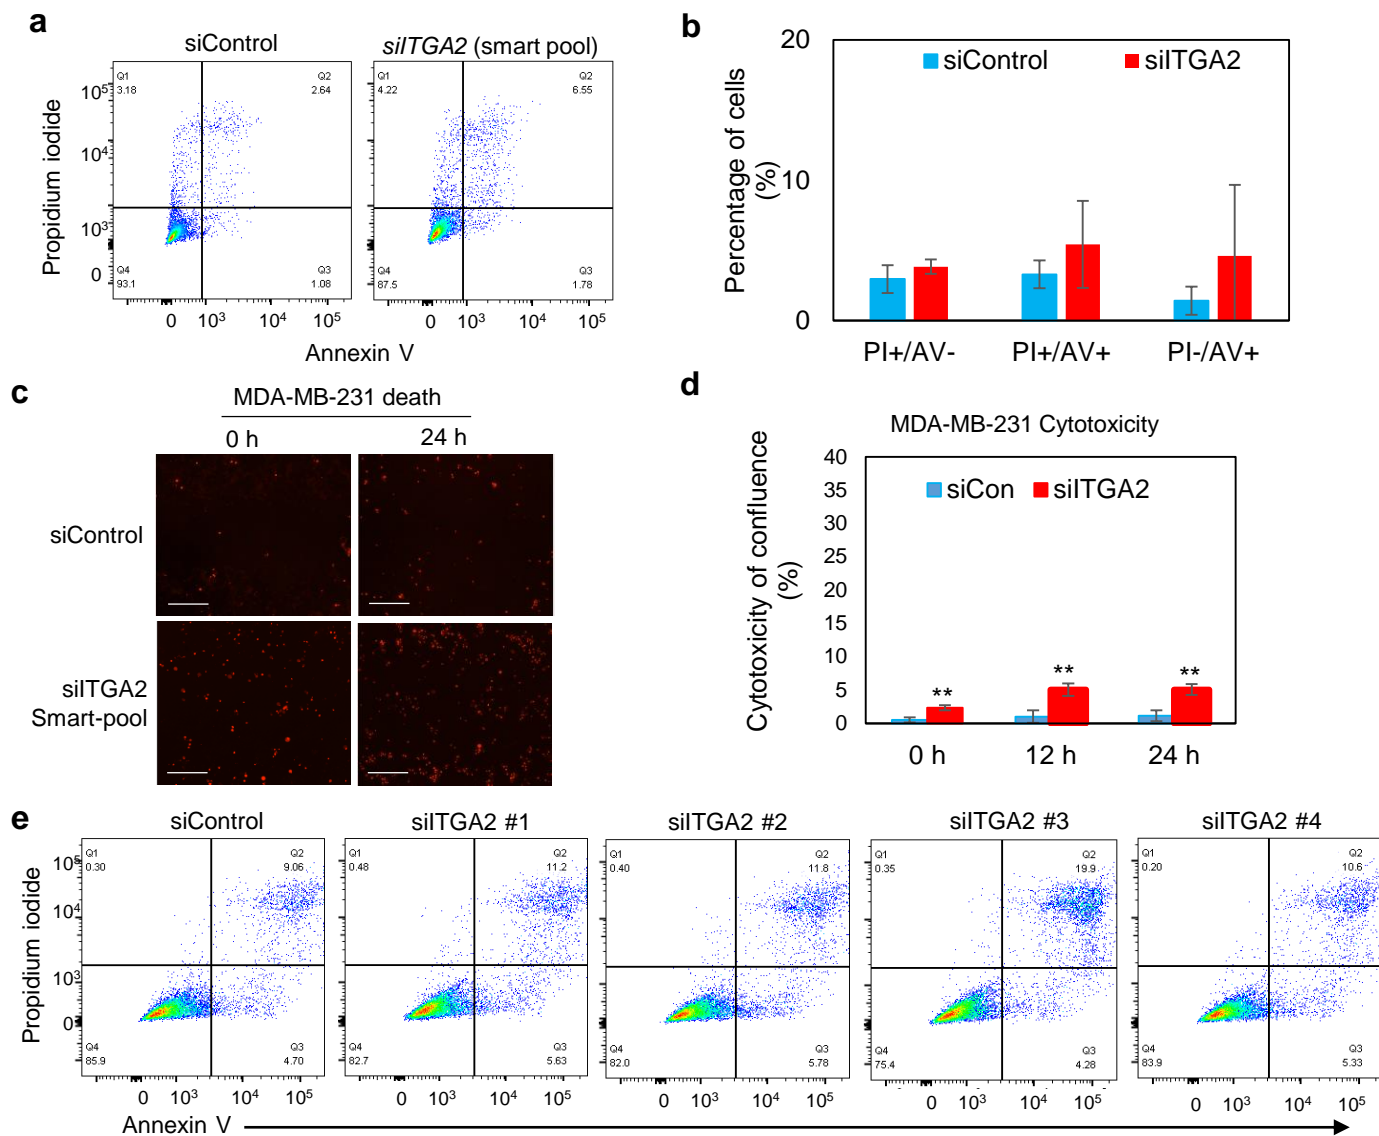

**Figure S5. Pooled and single siTGA2 caused minimal cell death (related to Fig 3).**

**a-b.** Representative flow dot plots (a) and quantification (b) of cell death measure by Annexin V (AV) /Propidium iodide (PI), PI<sup>+</sup> and/or AV<sup>+</sup>, n=2. **c-d.** siTGA2 Smart pool-induced cell death measured by cytotoxic red dye during wound healing (n=3, *t*-test \*\**P*<0.01). **e.** Flow plots of AV<sup>+</sup>PI<sup>+</sup> MDA-MB-231 cells transfected with individual siTGA2 #1-4. (*t*-test \*\**P*<0.01, \**P*<0.05). Error bars=S.D.



**Figure S6. Single si*TGA2*s regulate cell cycle**

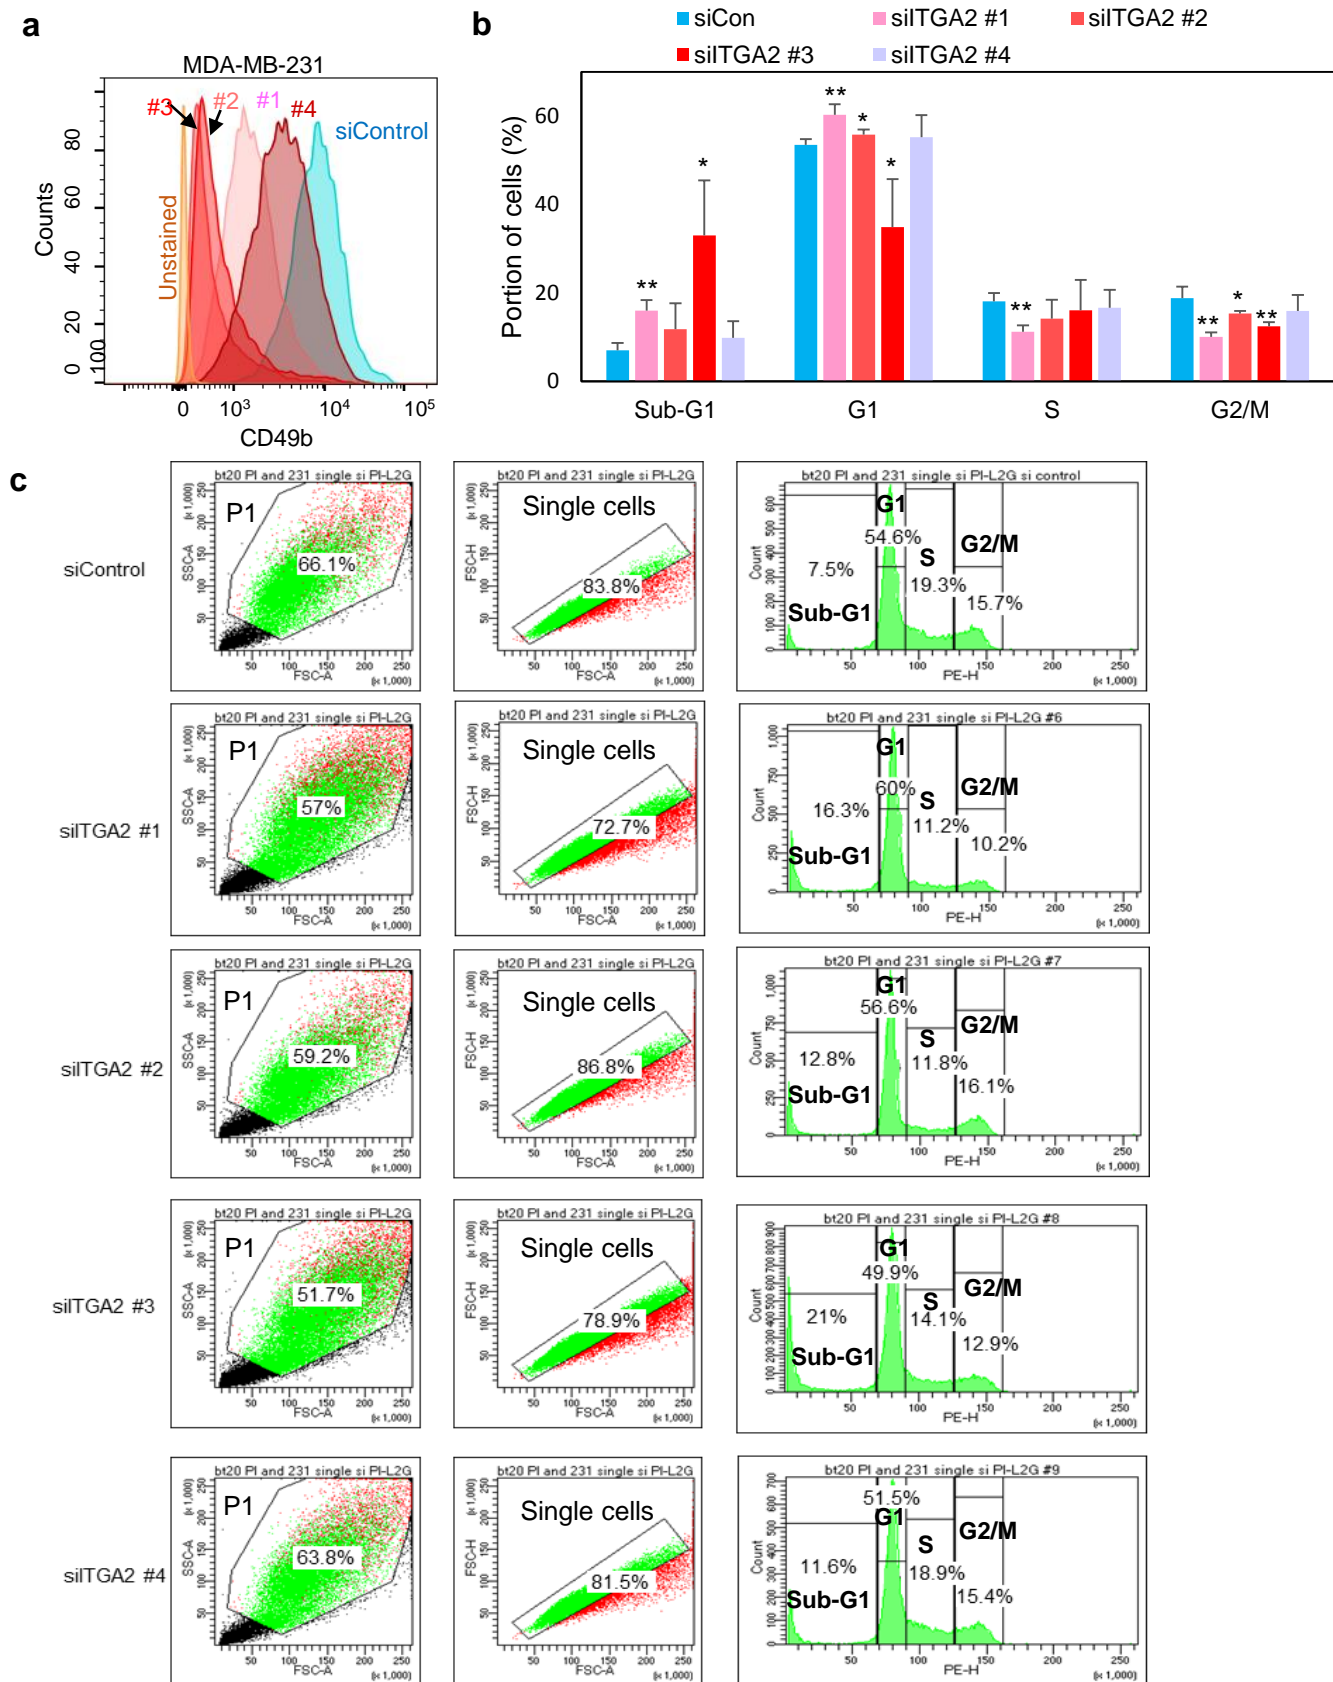

**Figure S6. Single si*TGA2* siRNAs regulate cell cycle (related to Fig 3).** a-c. Flow analyses of CD49b (a), cell cycle data (b), and gated populations from P1 (excluding cell debris), to single cells, and then to subG1, G1, S, and G2/M phases (c) in MDA-MB-231 cells transfected with individual si*TGA2* #1-4 (*t*-test \*\**P*<0.01, \**P*<0.05). Error bars=S.D.

**Figure S7. Effects of *ITGA2/Itga2* KD on cell migration and adhesion.**

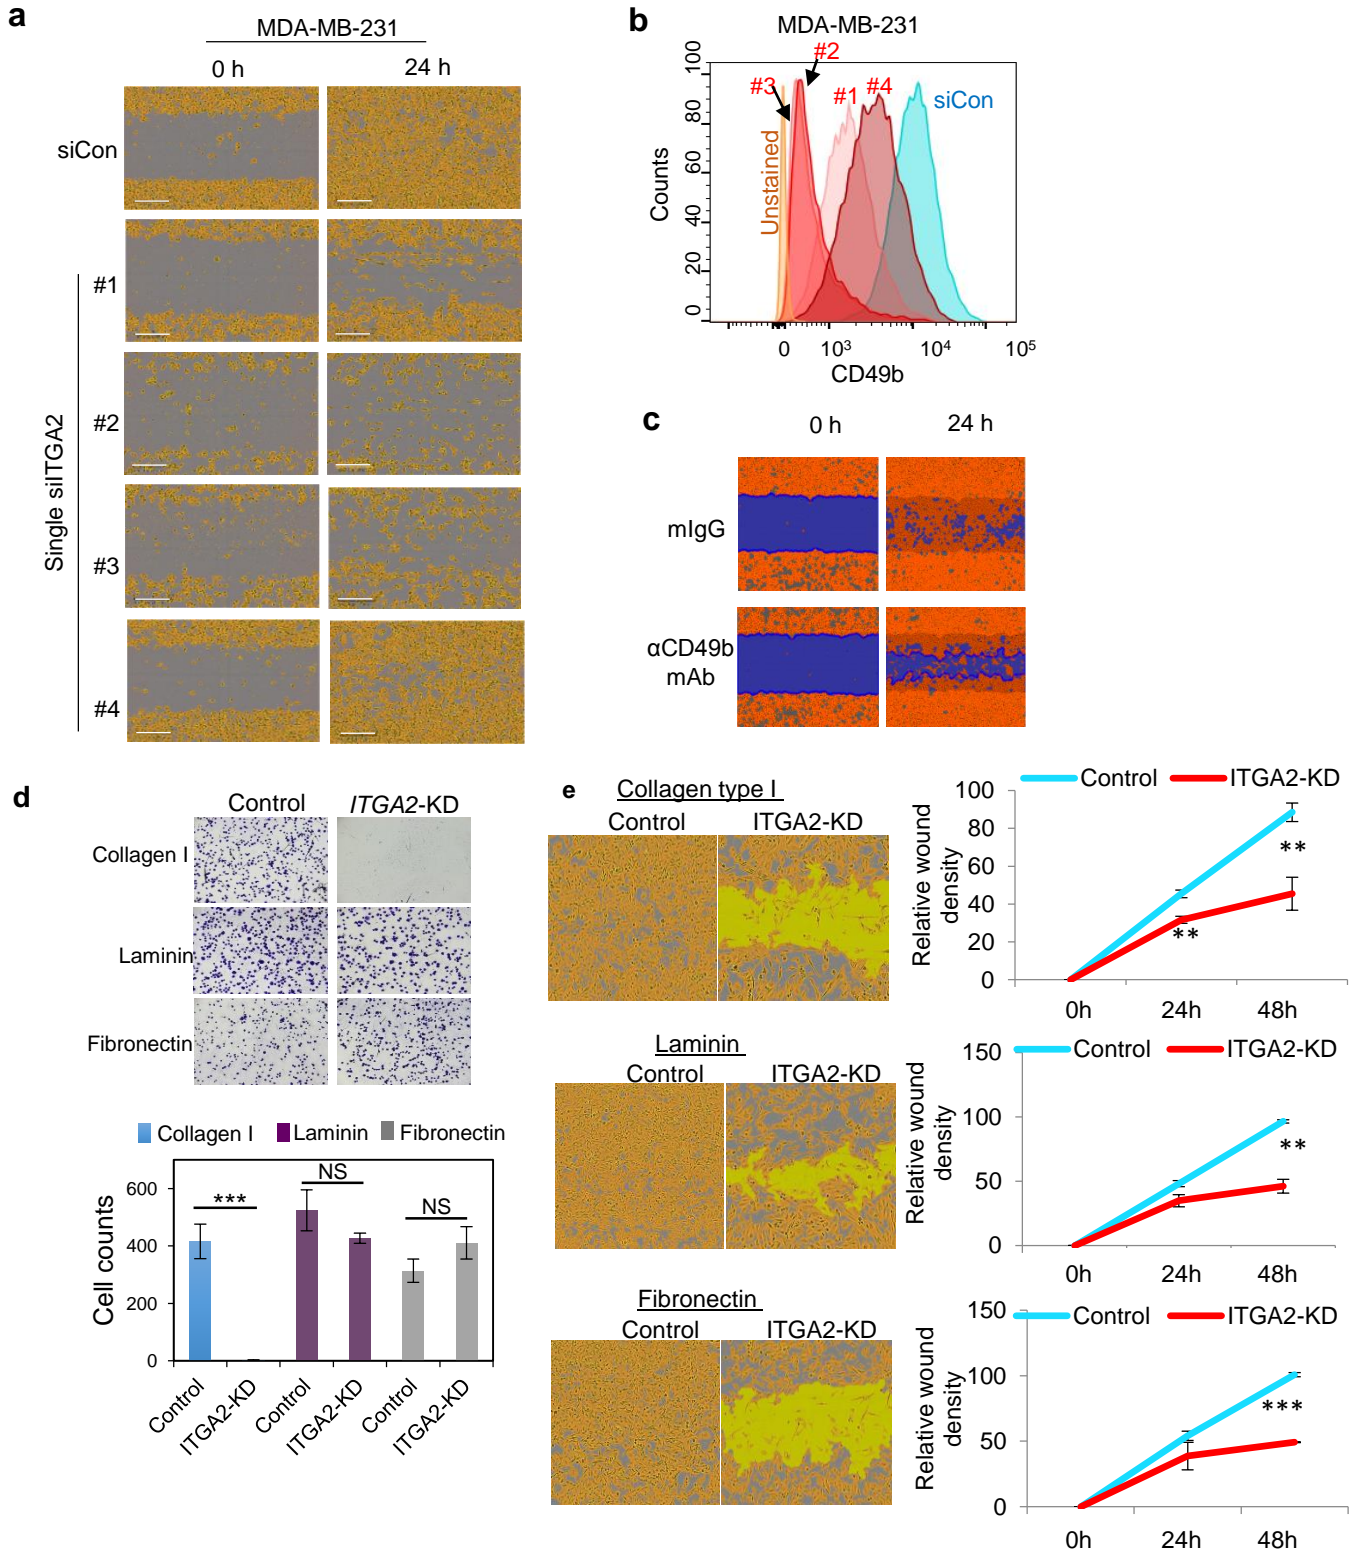

**Figure S7. Effects of *ITGA2/Itga2* KD on cell migration and tumor adhesion (related to Fig 4).**

- Migration of MDA-MB-231 cells transfected with individual siITGA2 #1-4 upon the scratched wound healing.
- Confirmation of reduced CD49b expression upon siITGA2 #1-4 mediated KD
- Images of slow filling of the scratched wound by MDA-MB-231 cells incubated with anti-CD49b mAb.
- Images (top panels) and quantified adhesive counts of MDA-MB-231 cells (control and *ITGA2* KD) on collagen I, laminin and fibronectin-coated plates. \*\*\*t test  $P < 0.001$ .
- Wound-healing migration of MDA-MB-231 cells (control and *ITGA2* KD) on collagen I, laminin and fibronectin-coated plates.

**Figure S8. *ITGA2* KD-regulated pathways by RNA sequencing.**

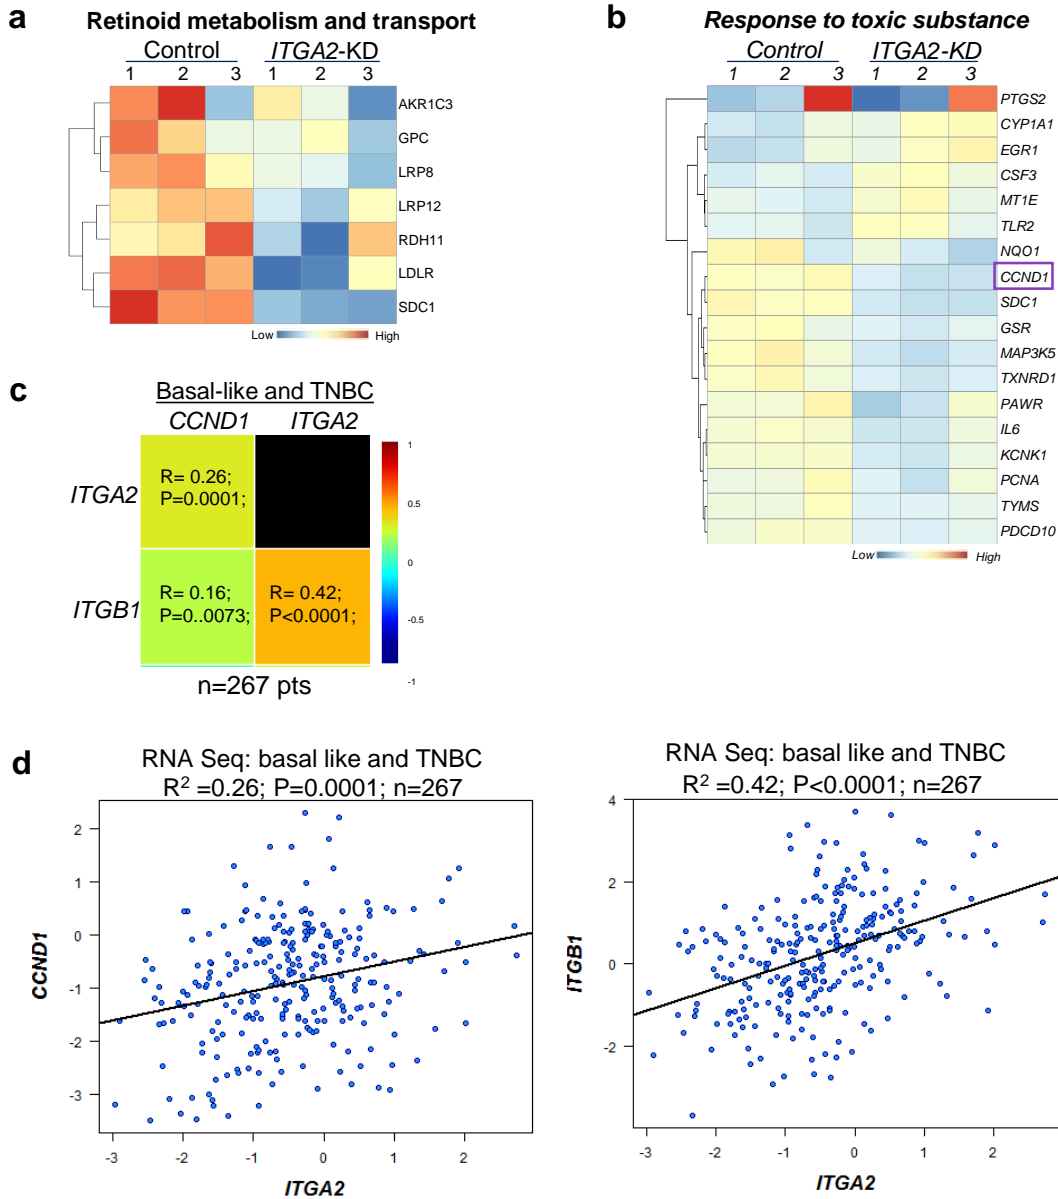

**Figure S8. *ITGA2* KD-regulated pathways by RNA sequencing (related to Fig 5).**

**a-b.** Heatmap of genes in representative pathways of retinoid metabolism and transport (**a**), and response to toxic substance (**b**).

**c-d.** RNA sequencing-based gene correlation map among *ITGA2*, *CCND1*, and *ITGB1* (**c**) and correlation plots (**d**) between *CCND1* and *ITGA2* as well as between *ITGB1* and *ITGA2* in basal-like and TNBC patients ( $n=267$ ) using online Breast Cancer Gene Expression Miner v4.0. Pearson's pairwise correlation coefficient  $R$  and  $P$  values are shown.



## Figure S9. ACLY does not contribute to migration phenotype

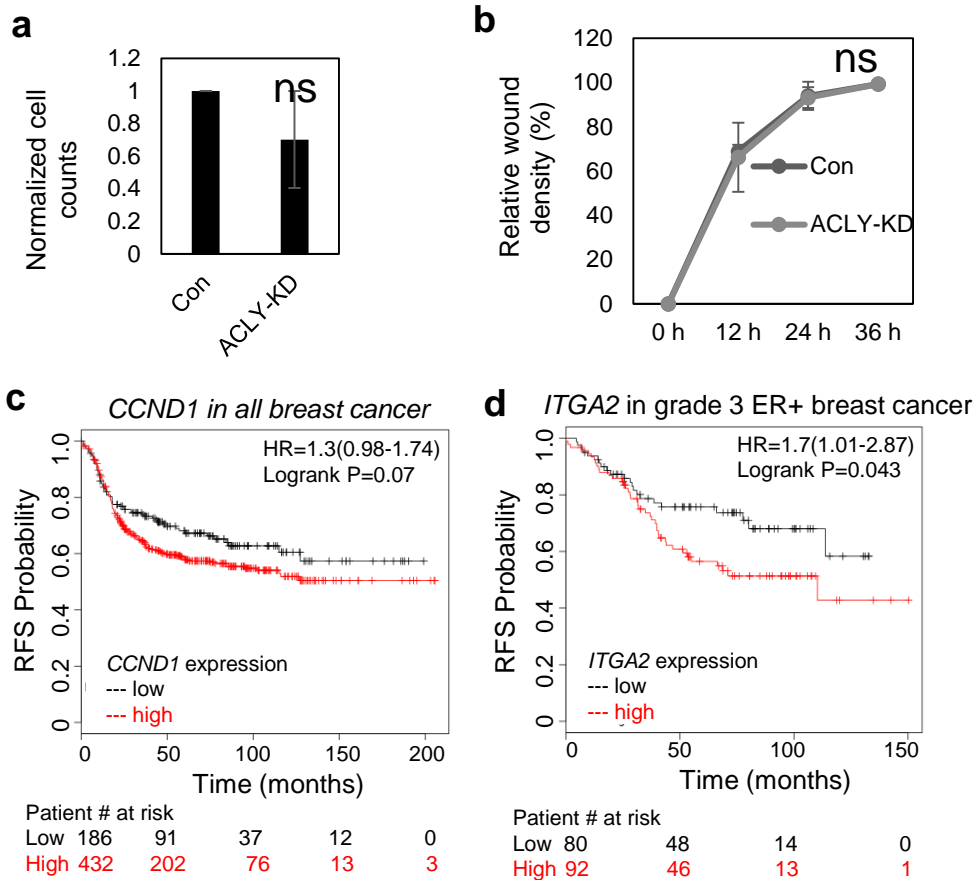

### Figure S9. ACLY does not contribute to migration phenotype (related to Figs 6-7).

- No significant changes of cell counts observed in MDA-MB-231 cells at 48 hour post ACLY knockdown (ACLY-KD) compared to the control (Con) ( $t$ -test  $P=0.29$ ,  $N=3$  biological replicates). Error bars=S.D.
- ACLY KD did not alter wound healing efficiency of MDA-MB-231 cells, measured by the density of filled cells in the wound ( $N=3$  biological replicates,  $t$ -test  $P=0.83$ ,  $0.89$ , and  $0.99$  for comparisons at 12 h, 24 h, and 36 h respectively). Error bars=S.D.
- Breast Cancer Kaplan-Meier Plotter analyses of RFS correlated with *CCND1* expression in all breast cancer (Log rank  $P=0.07$ ,  $n=618$ )
- Breast Cancer Kaplan-Meier Plotter analyses of RFS correlated with *ITGA2* in grade 3 ER+ breast cancer (Log rank  $P=0.043$ ,  $n=172$ ).
